# Supplementary material for: Three-dimensional interactions between enhancers and promoters during intestinal differentiation depend upon HNF4
Source: PubMed Central journal article supplement — Cell Rep. Author manuscript; Available in PMC 2021 Feb 22. (PMC7899294; doi:10.1016/j.celrep.2020.108679), 2021-01-26
Supplement: NIHMS1667156-supplement-1.pdf [file NIHMS1667156-supplement-1.pdf]

**Cell Reports, Volume 34**

**Supplemental Information**

**Three-dimensional interactions**

**between enhancers and promoters**

**during intestinal differentiation depend upon HNF4**

**Lei Chen, Weihuan Cao, Rohit Aita, Dennis Aldea, Juan Flores, Nan Gao, Edward M. Bonder, Christopher E. Ellison, and Michael P. Verzi**

## SUPPLEMENTAL FIGURES

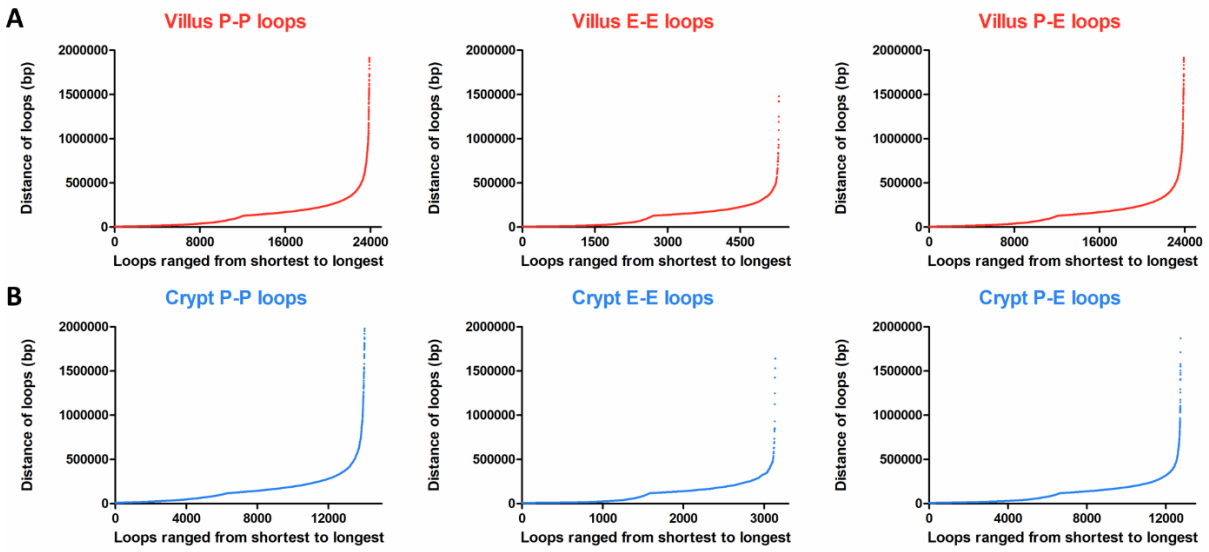

**Figure S1. Distance of chromatin loops in (A) villus and (B) crypt cells as revealed by H3K4me3 HiChIP-seq.** Related to Figure 1. P-P loops: promoter-promoter loops; E-E loops: enhancer-enhancer loops; P-E loops: promoter-enhancer loops ( $n = 2$  biological replicates each condition). Loops with  $q \leq 0.0001$  and counts  $\geq 4$  (combined 2 replicates) were used to characterize the distance of chromatin loops.

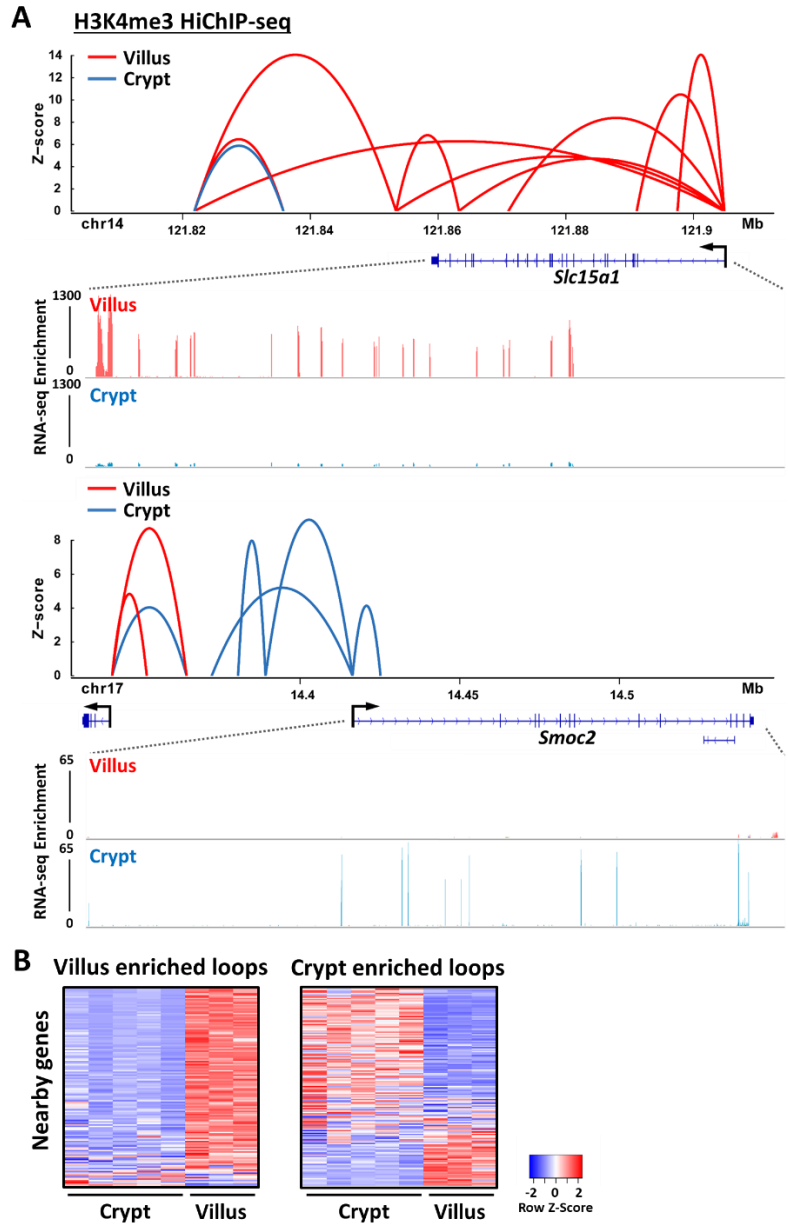

**Figure S2. Differential looping events across the crypt-villus axis.** Related to Figure 2. **(A)** Chromatin looping examples of a villus-specific gene and a crypt-specific gene. Loops with  $q \leq 0.0001$  and counts  $\geq 8$  (combined 2 replicates) are visualized by Sushi. **(B)** Heatmap of transcript levels of nearby genes (within 10 kb of TSSs) of villus and crypt enriched loops. RNA-seq (GSE53545, GSE70766 and GSE102171):  $n = 5$  crypts and 3 villi; H3K4me3 HiChIP-seq:  $n = 2$  biological replicates; TSSs: transcriptional start sites.

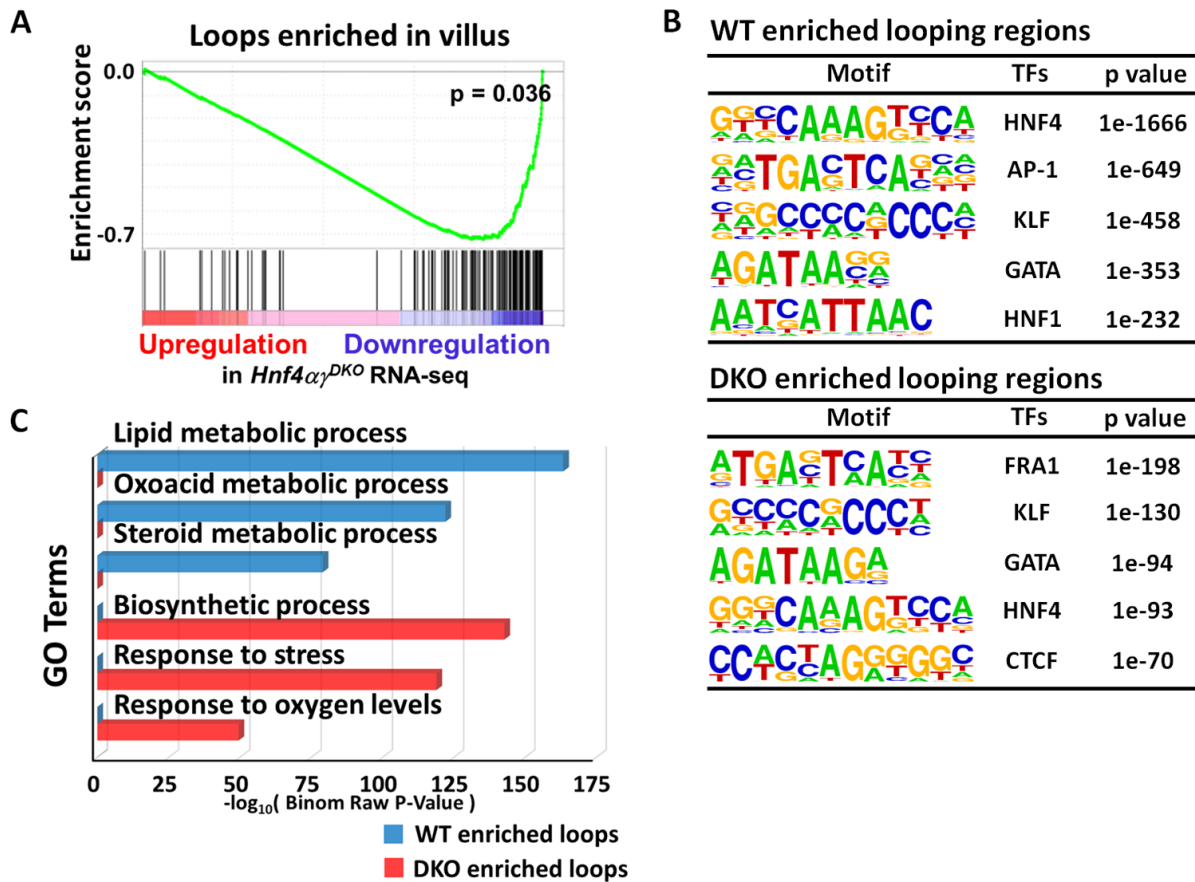

**Figure S3. HOMER motif and gene ontology analysis of WT and *Hnf4α<sup>yDKO</sup>* enriched looping regions.** Related to Figure 2. (A) GSEA (Kolmogorov-Smirnov test,  $p = 0.036$ ) reveals that transcriptome levels of genes nearby the villus-enriched looping regions are significantly downregulated upon HNF4 loss. H3K4me3 HiChIP-seq;  $n = 2$  biological replicates. (B) HOMER *de novo* motif enrichment (see full table in [Table S5](#)). (C) Functional annotation (GREAT) of nearby genes (within 10 kb of TSSs) of WT-enriched and *Hnf4α<sup>yDKO</sup>*-enriched loops. *P*-values were calculated using GREAT (see full table in [Table S6](#)). TSSs: transcriptional start sites.

## A Chylomicron production

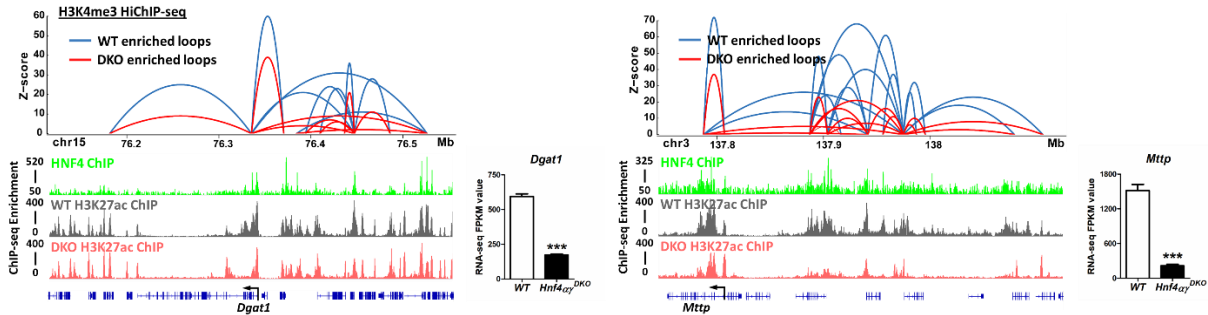

## B Lipid droplet (LD) production

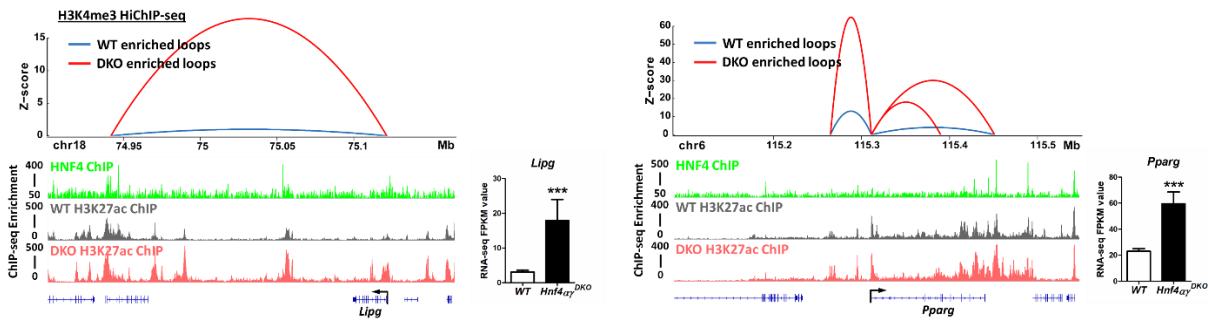

**Figure S4. Additional examples of regulatory effects of HNF4 factors at genes associated with (A) chylomicron production and (B) lipid droplet production.** Related to Figure 4. Differential loops (DEseq2  $p < 0.05$ ) are visualized by Sushi for loops with  $q \leq 0.0001$  and  $\geq 8$  counts (over 2 combined biological replicates). H3K4me3 HiChIP-seq:  $n = 2$  biological replicates; H3K27ac ChIP-seq (WT vs *Hnf4αy*<sup>DKO</sup>; GSE112946):  $n = 2$  biological replicates; HNF4 ChIP-seq (WT vs *Hnf4αy*<sup>DKO</sup>; GSE112946):  $n = 2$  biological replicates for each HNF4 paralogue; RNA-seq (WT vs *Hnf4αy*<sup>DKO</sup>; GSE112946):  $n = 3$  biological replicates, Cuffdiff FDR  $< 0.001$ \*\*\*.
